# Supplementary material
Source: PubMed Central journal article supplement (PMC8528217)
Supplement: MD-012-D1MD00213A-s001.pdf [file MD-012-D1MD00213A-s001.pdf]

Supplementary data

|                       | MW (Da) | cLogP | TPSA (Å <sup>2</sup> ) | #rings | #HBD | #HBA | #RB  |
|-----------------------|---------|-------|------------------------|--------|------|------|------|
| <b>Minimum</b>        | 144.1   | -0.34 | 52.6                   | 0.00   | 0.00 | 2.00 | 2.00 |
| <b>10% Percentile</b> | 226.7   | 0.37  | 63.0                   | 1.00   | 1.00 | 3.60 | 2.60 |
| <b>25% Percentile</b> | 441.6   | 1.62  | 81.0                   | 2.50   | 2.00 | 6.50 | 4.50 |
| <b>Median</b>         | 615.5   | 4.13  | 150.0                  | 3.00   | 3.00 | 10.0 | 7.00 |
| <b>Mean</b>           | 621.8   | 4.15  | 143.7                  | 4.04   | 2.68 | 9.48 | 7.76 |
| <b>75% Percentile</b> | 831.0   | 6.41  | 198.5                  | 5.50   | 3.00 | 13.5 | 11.5 |
| <b>90% Percentile</b> | 931.8   | 7.65  | 222.2                  | 8.40   | 4.40 | 14.4 | 14.0 |
| <b>Maximum</b>        | 1030    | 10.3  | 242.0                  | 9.00   | 6.00 | 16.0 | 15.0 |

**Supplementary Table 1.** Mean, median and percentile values for physicochemical properties of approved PPI Modulators

|                       | <b>MW (Da)</b> | <b>cLogP</b> | <b>TPSA (Å<sup>2</sup>)</b> | <b>#rings</b> | <b>#HBD</b> | <b>#HBA</b> | <b>#RB</b> |
|-----------------------|----------------|--------------|-----------------------------|---------------|-------------|-------------|------------|
| <b>Minimum</b>        | 26.04          | -16.57       | 0                           | 0.00          | 0.00        | 0.00        | 0.00       |
| <b>10% Percentile</b> | 167.2          | -2.448       | 21.26                       | 0.00          | 0.00        | 2.00        | 1.00       |
| <b>25% Percentile</b> | 247.7          | -0.151       | 41.62                       | 1.00          | 1.00        | 2.00        | 2.00       |
| <b>Median</b>         | 335.5          | 2.062        | 72.83                       | 3.00          | 2.00        | 4.00        | 5.00       |
| <b>Mean</b>           | 384.7          | 1.623        | 91.90                       | 2.65          | 2.24        | 4.91        | 6.03       |
| <b>75% Percentile</b> | 444.5          | 3.671        | 109.7                       | 4.00          | 3.00        | 6.00        | 8.00       |
| <b>90% Percentile</b> | 609.7          | 4.969        | 167.9                       | 5.00          | 4.00        | 9.00        | 12.0       |
| <b>Maximum</b>        | 2002           | 18.23        | 805.5                       | 18.00         | 25.0        | 48.0        | 58.0       |

**Supplementary Table 2.** Mean, median and percentile values for physicochemical properties of non-PPI approved drugs.

|                       | <b>MW (Da)</b> | <b>cLogP</b> | <b>TPSA (Å<sup>2</sup>)</b> | <b>#rings</b> | <b>#HBD</b> | <b>#HBA</b> | <b>#RB</b> |
|-----------------------|----------------|--------------|-----------------------------|---------------|-------------|-------------|------------|
| <b>Minimum</b>        | 283.4          | 1.16         | 49.4                        | 1.00          | 0.00        | 3.00        | 2.00       |
| <b>10% Percentile</b> | 332.1          | 1.59         | 66.2                        | 3.00          | 0.10        | 3.10        | 3.10       |
| <b>25% Percentile</b> | 444.6          | 2.75         | 90.2                        | 4.00          | 1.00        | 5.00        | 5.00       |
| <b>Median</b>         | 558.6          | 3.57         | 104.0                       | 5.00          | 2.00        | 7.00        | 7.00       |
| <b>Mean</b>           | 544.7          | 4.27         | 108.9                       | 4.47          | 2.17        | 6.80        | 7.33       |
| <b>75% Percentile</b> | 624.5          | 4.69         | 128.3                       | 5.00          | 3.00        | 8.00        | 9.00       |
| <b>90% Percentile</b> | 724.7          | 8.69         | 157.8                       | 6.00          | 3.90        | 10.0        | 14.5       |
| <b>Maximum</b>        | 974.6          | 12.39        | 195.0                       | 7.00          | 8.00        | 14.0        | 17.0       |

**Supplementary Table 3.** Mean, median and percentile values for physicochemical properties of PPI modulators in clinical trials
